# Supplementary material for: Risk and Outcome of Secondary Primary Malignancies After Radioactive Iodine Treatment in Differentiated Thyroid Cancer Patients
Source: Research Square preprint supplement (doi:10.21203/rs.3.rs-137480/v1), 2021-01-18
Supplement: Supplementary file 1 [file 6ed9173894a1e91c3bb3645c.pdf]

## Supplemental Data

Risk and outcome of secondary primary malignancies after radioactive iodine treatment in differentiated thyroid cancer patients

Xiaoran Mei, Xiaoqin Yao, Fang Feng, Weiwei Cheng, Hui Wang

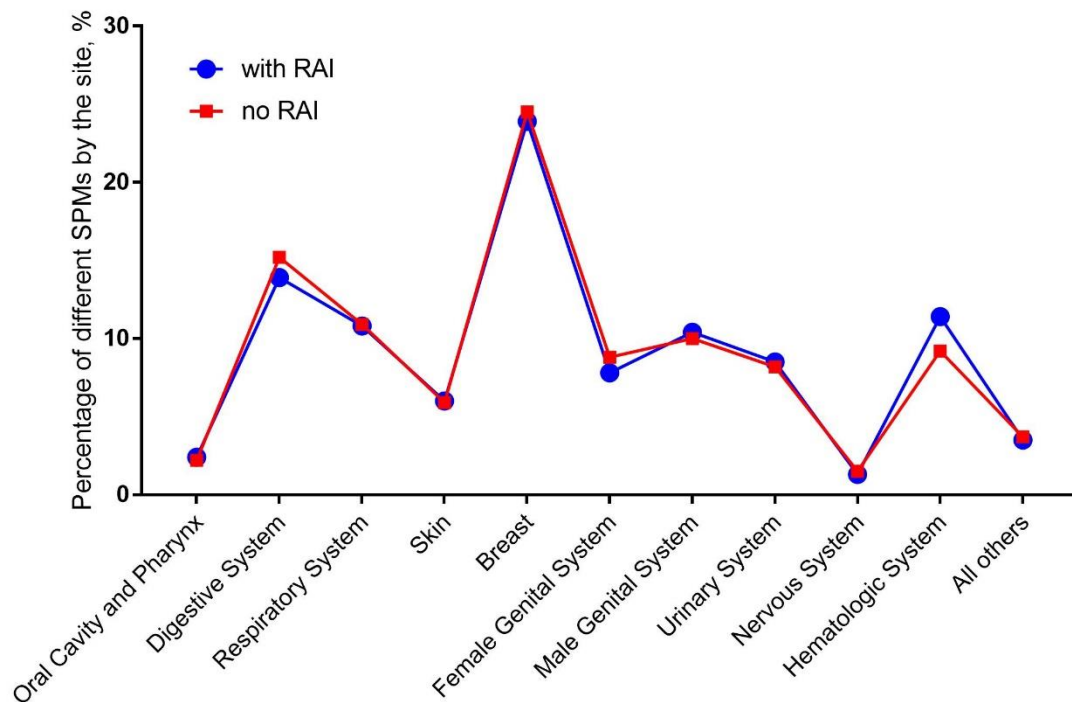

Figure S1. The spectrum of SPMs in patients treated with and without RAI.

|                                | Incidence in<br>all DTC<br>survivors | Number of patients, n(%) |             |
|--------------------------------|--------------------------------------|--------------------------|-------------|
|                                |                                      | +RAI                     | -RAI        |
| <b>All cancer<br/>combined</b> | <b>4.4%</b>                          | <b>2289</b>              | <b>2339</b> |
| Oral Cavity and<br>Pharynx     | 0.1%                                 | 56(2.4%)                 | 51(2.2%)    |
| Digestive System               | 0.6%                                 | 319(13.9%)               | 356(15.2%)  |
| Respiratory System             | 0.5%                                 | 247(10.8%)               | 254(10.9%)  |
| Skin                           | 0.3%                                 | 138(6.0%)                | 137(5.9%)   |
| Breast                         | 1.1%                                 | 547(23.9%)               | 574(24.5%)  |
| Female Genital<br>System       | 0.4%                                 | 179(7.8%)                | 206(8.8%)   |
| Male Genital<br>System         | 0.5%                                 | 237(10.4%)               | 233(10.0%)  |
| Urinary System                 | 0.4%                                 | 194(8.5%)                | 191(8.2%)   |
| Nervous System                 | 0.1%                                 | 30(1.3%)                 | 36(1.5%)    |
| Hematologic<br>System          | 0.5%                                 | 261(11.4%)               | 215(9.2%)   |

Table S1. The incidence of SPMs in all DTC survivors and the proportion of each system of SPMs by their site.

|                            | <b>Crude RR<br/>(95% CI)</b> | <b><i>P value</i></b> |
|----------------------------|------------------------------|-----------------------|
| All cancer combined        | 1.01(0.95-1.07)              | <i>0.749</i>          |
| Oral Cavity and<br>Pharynx | 1.13(0.78-1.66)              | <i>0.520</i>          |
| Digestive System           | 0.92(0.79-1.08)              | <i>0.310</i>          |
| Respiratory System         | 1.00(0.84-1.20)              | <i>0.971</i>          |
| Skin                       | 1.04(0.82-1.31)              | <i>0.750</i>          |
| Breast                     | 0.98(0.87-1.11)              | <i>0.778</i>          |
| Female Genital System      | 0.90(0.73-1.10)              | <i>0.286</i>          |
| Male Genital System        | 1.05(0.88-1.26)              | <i>0.602</i>          |
| Urinary System             | 1.05(0.86-1.28)              | <i>0.647</i>          |
| Nervous System             | 0.86(0.53-1.40)              | <i>0.541</i>          |
| Hematologic System         | 1.25(1.05-1.50)              | <i>0.015</i>          |

Table S2. The crude relative risk of SPMs associated with RAI treatment by the site of SPMs.
